# Supplementary material
Source: publisher figshare collection journal article supplement (https://karger.figshare.com/articles/dataset/_/5128579)
Supplement: Supplementary file 1 [file 1]

Archive with 2 entries (2 files):
- 000438942_sm_Table_1.doc
- 000438942_sm_Table_2.PDF
