# Supplementary material
Source: publisher figshare collection journal article supplement (https://karger.figshare.com/articles/dataset/_/5128579)
Supplement: Supplementary file 1 [file 1 › 000438942_sm_Table_2.PDF]

**Supplemental Table 2. Data of Representative Adjuvant Chemotherapy**

| Regimen                 | Groups                | 5-year overall survival rates | 5-year disease-free survival rates | Percentages of adverse reactions | Main toxicity                               | Treatment related death | Studies (Targeted stages)      |
|-------------------------|-----------------------|-------------------------------|------------------------------------|----------------------------------|---------------------------------------------|-------------------------|--------------------------------|
| CDDP+VDS, VB, VNR or EP | Untreated<br>Adjuvant | 40.4%<br>44.5%                | 34.3%<br>39.4%                     | Grade 4; 22.6%                   | Neutropenia, thrombocytopenia, and vomiting | 0.8%                    | IALT (Stage I-III)             |
| CBDCA+TAX               | Untreated<br>Adjuvant | 58%<br>60%                    | 48%<br>52%                         | Grade 4; 28%                     | Neutropenia                                 | none                    | CALGB (Stage IB)               |
| CDDP+VNR                | Untreated<br>Adjuvant | 54%<br>69%                    | 49%<br>61%                         | Grade 3 or 4; 73%                | Neutropenia                                 | 0.8%                    | JBR10 (Stage I-II)             |
| CDDP+VNR±radiotherapy   | Untreated<br>Adjuvant | 42.6%<br>51.2%                | not reported<br>not reported       | Grade 3 or 4; 85%                | Neutropenia                                 | 2.0%                    | ANITA (Stage IB-IIIa)          |
| UFT                     | Untreated<br>Adjuvant | 74.0%<br>85.0%                | not reported<br>not reported       | Grade 3; 1%, Grade 4; 0%         | Anorexia and nausea or vomiting             | none                    | Stage IB adenocarcinoma        |
| <b>S-1</b>              | <b>Adjuvant</b>       | <b>72.5%</b>                  | <b>67.5%</b>                       | <b>Grade 3; 20%, Grade 4; 0%</b> | <b>Neutropenia and Anorexia</b>             | <b>none</b>             | <b>Present (Stage IB-IIIa)</b> |

CDDP = Cisplatin, VDS = Vindesine, VB = Vinblastine, VNR = Vinorelbine, CBDCA = Carboplatin, TAX = Paclitaxel.
